# Supplementary material for: Anticancer activity of Zingiber ottensii essential oil and its nanoformulations
Source: PubMed Central journal article supplement (PMC8786151; doi:10.1371/journal.pone.0262335), 2022-01-24
Supplement: pone.0262335.s002.pdf [file pone.0262335.s002.pdf]

**S1 Table. Cytotoxicity of the essential oils and drugs against A549 cells by MTT test.**

| Plant essential oil or drug  | IC <sub>50</sub> value |        |        |        |       |
|------------------------------|------------------------|--------|--------|--------|-------|
|                              | 1                      | 2      | 3      | Mean   | SD    |
| <i>A. galanga</i> (µg/mL)    | >100                   | >100   | >100   | >100   | -     |
| <i>B. rotunda</i> (µg/mL)    | >100                   | >100   | >100   | >100   | -     |
| <i>C. aeruginosa</i> (µg/mL) | 24.20                  | 29.51  | 35.25  | 29.66  | 5.53  |
| <i>C. longa</i> (µg/mL)      | 38.18                  | 52.37  | 50.72  | 47.09  | 7.76  |
| <i>C. mangga</i> (µg/mL)     | 71.29                  | 73.40  | 69.53  | 71.41  | 1.93  |
| <i>Z. montanum</i> (µg/mL)   | >100                   | >100   | >100   | >100   | -     |
| <i>Z. officinale</i> (µg/mL) | 33.93                  | 35.97  | 35.25  | 35.05  | 1.03  |
| <i>Z. ottensii</i> (µg/mL)   | 38.74                  | 49.14  | 51.23  | 46.37  | 6.69  |
| Doxorubicin (ng/mL)          | 283.25                 | 304.20 | 293.31 | 293.59 | 10.48 |
| Idarubicin (ng/mL)           | 26.65                  | 44.01  | 41.65  | 37.44  | 9.42  |
| Cytarabine (µg/mL)           | >100                   | >100   | >100   | >100   | -     |
| Cyclophosphamide (µg/mL)     | >400                   | >400   | >400   | >400   | -     |
