# Supplementary material for: Anticancer activity of Zingiber ottensii essential oil and its nanoformulations
Source: PubMed Central journal article supplement (PMC8786151; doi:10.1371/journal.pone.0262335), 2022-01-24
Supplement: pone.0262335.s003.pdf [file pone.0262335.s003.pdf]

**S2 Table. Cytotoxicity of the essential oils and drugs against MCF-7 cells by MTT test.**

| Plant essential oil or drug  | IC <sub>50</sub> value |       |       |       |      |
|------------------------------|------------------------|-------|-------|-------|------|
|                              | 1                      | 2     | 3     | Mean  | SD   |
| <i>A. galanga</i> (µg/mL)    | 96.99                  | 86.95 | 95.07 | 93.00 | 5.33 |
| <i>B. rotunda</i> (µg/mL)    | 17.49                  | 21.99 | 19.35 | 19.61 | 2.26 |
| <i>C. aeruginosa</i> (µg/mL) | 18.80                  | 20.89 | 20.85 | 20.18 | 1.20 |
| <i>C. longa</i> (µg/mL)      | 36.49                  | 39.84 | 44.75 | 40.36 | 4.15 |
| <i>C. mangga</i> (µg/mL)     | 34.75                  | 32.94 | 34.34 | 34.01 | 0.95 |
| <i>Z. montanum</i> (µg/mL)   | 72.87                  | 64.90 | 73.89 | 70.55 | 4.92 |
| <i>Z. officinale</i> (µg/mL) | 24.83                  | 19.93 | 29.15 | 24.64 | 4.61 |
| <i>Z. ottensii</i> (µg/mL)   | 9.26                   | 11.57 | 8.48  | 9.77  | 1.61 |
| Doxorubicin (ng/mL)          | 11.96                  | 10.08 | 18.85 | 13.63 | 4.62 |
| Idarubicin (ng/mL)           | 8.09                   | 2.29  | 6.38  | 5.58  | 2.98 |
| Cytarabine (µg/mL)           | 2.23                   | 1.56  | 1.83  | 1.87  | 0.34 |
| Cyclophosphamide (µg/mL)     | >400                   | >400  | >400  | >400  | -    |
