# Supplementary material for: Anticancer activity of Zingiber ottensii essential oil and its nanoformulations
Source: PubMed Central journal article supplement (PMC8786151; doi:10.1371/journal.pone.0262335), 2022-01-24
Supplement: pone.0262335.s004.pdf [file pone.0262335.s004.pdf]

**S3 Table. Cytotoxicity of the essential oils and drugs against HeLa cells by MTT test.**

| Essential oil or drug        | IC <sub>50</sub> value |       |        |       |       |
|------------------------------|------------------------|-------|--------|-------|-------|
|                              | 1                      | 2     | 3      | Mean  | SD    |
| <i>A. galanga</i> (µg/mL)    | 106.27                 | 95.33 | 81.35  | 94.32 | 12.49 |
| <i>B. rotunda</i> (µg/mL)    | 24.04                  | 41.51 | 24.62  | 30.06 | 9.92  |
| <i>C. aeruginosa</i> (µg/mL) | 17.89                  | 15.59 | 17.49  | 16.99 | 1.23  |
| <i>C. longa</i> (µg/mL)      | 33.07                  | 23.34 | 23.67  | 26.69 | 5.52  |
| <i>C. mangga</i> (µg/mL)     | 45.57                  | 42.04 | 36.82  | 41.48 | 4.40  |
| <i>Z. montanum</i> (µg/mL)   | 92.73                  | 79.12 | 101.08 | 90.97 | 11.08 |
| <i>Z. officinale</i> (µg/mL) | 17.13                  | 17.67 | 27.81  | 20.87 | 6.01  |
| <i>Z. ottensii</i> (µg/mL)   | 22.43                  | 31.35 | 15.97  | 23.25 | 7.73  |
| Doxorubicin (ng/mL)          | 24.19                  | 17.38 | 26.32  | 22.63 | 4.67  |
| Idarubicin (ng/mL)           | 3.46                   | 5.78  | 3.22   | 4.16  | 1.42  |
| Cytarabine (µg/mL)           | 2.18                   | 1.76  | 1.49   | 1.81  | 0.35  |
| Cyclophosphamide (µg/mL)     | >400                   | >400  | >400   | >400  | -     |
