# Supplementary material for: Anticancer activity of Zingiber ottensii essential oil and its nanoformulations
Source: PubMed Central journal article supplement (PMC8786151; doi:10.1371/journal.pone.0262335), 2022-01-24
Supplement: pone.0262335.s005.pdf [file pone.0262335.s005.pdf]

**S4 Table. Cytotoxicity of the essential oils and drugs against K562 cells by MTT test.**

| Plant essential oil or drug  | IC <sub>50</sub> value |        |        |        |       |
|------------------------------|------------------------|--------|--------|--------|-------|
|                              | 1                      | 2      | 3      | Mean   | SD    |
| <i>A. galanga</i> (µg/mL)    | >100                   | >100   | >100   | >100   | -     |
| <i>B. rotunda</i> (µg/mL)    | >100                   | >100   | >100   | >100   | -     |
| <i>C. aeruginosa</i> (µg/mL) | 12.18                  | 14.13  | 13.99  | 13.43  | 1.09  |
| <i>C. longa</i> (µg/mL)      | 19.90                  | 24.98  | 27.34  | 24.07  | 3.80  |
| <i>C. mangga</i> (µg/mL)     | 29.76                  | 34.01  | 30.66  | 31.48  | 2.23  |
| <i>Z. montanum</i> (µg/mL)   | 96.66                  | 88.31  | 95.77  | 93.58  | 4.59  |
| <i>Z. officinale</i> (µg/mL) | 18.85                  | 16.00  | 17.33  | 17.39  | 1.43  |
| <i>Z. ottensii</i> (µg/mL)   | 59.70                  | 70.27  | 51.49  | 60.49  | 9.41  |
| Doxorubicin (ng/mL)          | 752.88                 | 780.53 | 867.94 | 800.45 | 60.06 |
| Idarubicin (ng/mL)           | 374.60                 | 402.88 | 450.71 | 409.40 | 38.48 |
| Cytarabine (µg/mL)           | >100                   | >100   | >100   | >100   | -     |
| Cyclophosphamide (µg/mL)     | >400                   | >400   | >400   | >400   | -     |
