# Supplementary material for: Anticancer activity of Zingiber ottensii essential oil and its nanoformulations
Source: PubMed Central journal article supplement (PMC8786151; doi:10.1371/journal.pone.0262335), 2022-01-24
Supplement: pone.0262335.s006.pdf [file pone.0262335.s006.pdf]

**S5 Table. Total numbers of MCF-7 cells following cytarabine or ZOEO treatment were compared with cell control.**

| <b>Treatments</b> | <b>Viable cells (%)</b> |       |       |       |      | <b>Dead cells (%)</b> |       |       |       |      |
|-------------------|-------------------------|-------|-------|-------|------|-----------------------|-------|-------|-------|------|
|                   | 1                       | 2     | 3     | Mean  | SD   | 1                     | 2     | 3     | Mean  | SD   |
| Cell control      | 93.33                   | 91.25 | 87.50 | 90.69 | 2.96 | 6.67                  | 8.75  | 12.50 | 9.31  | 2.96 |
| Vehicle control   | 87.64                   | 91.10 | 86.21 | 88.31 | 2.52 | 12.36                 | 8.90  | 13.79 | 11.69 | 2.52 |
| Positive control  | 57.41                   | 49.18 | 43.48 | 50.02 | 7.00 | 42.59                 | 50.82 | 56.52 | 49.98 | 7.00 |
| ZOEO 2 µg/mL      | 77.50                   | 73.43 | 68.45 | 73.13 | 4.53 | 22.50                 | 26.57 | 31.55 | 26.87 | 4.53 |
| ZOEO 3 µg/mL      | 74.91                   | 68.29 | 57.72 | 66.97 | 8.67 | 25.09                 | 31.71 | 42.28 | 33.03 | 8.67 |
| ZOEO 10 µg/mL     | 62.12                   | 55.67 | 49.69 | 55.83 | 6.22 | 37.88                 | 44.33 | 50.31 | 44.17 | 6.22 |
