# Supplementary material for: Anticancer activity of Zingiber ottensii essential oil and its nanoformulations
Source: PubMed Central journal article supplement (PMC8786151; doi:10.1371/journal.pone.0262335), 2022-01-24
Supplement: pone.0262335.s007.pdf [file pone.0262335.s007.pdf]

**S6 Table. Cell cycle distribution of MCF-7 after 48 h exposed to various concentrations of ZOEO in comparison with the controls.**

| Treatments       | Sub G <sub>1</sub> population (%) |      |      |       |      |
|------------------|-----------------------------------|------|------|-------|------|
|                  | 1                                 | 2    | 3    | Mean  | SD   |
| Cell control     | 6.6                               | 7    | 8.73 | 7.44  | 1.13 |
| Vehicle control  | 6.3                               | 7.7  | 5.4  | 6.47  | 1.16 |
| Positive control | 65.27                             | 59.9 | 63.3 | 62.82 | 2.72 |
| ZOEO 2 µg/mL     | 11.5                              | 10.9 | 11.3 | 11.23 | 0.31 |
| ZOEO 3 µg/mL     | 12.9                              | 13.2 | 13.4 | 13.17 | 0.25 |
| ZOEO 10 µg/mL    | 13.3                              | 16.3 | 17.4 | 15.67 | 2.12 |

| Treatments       | G <sub>0</sub> /G <sub>1</sub> population (%) |      |      |       |      |
|------------------|-----------------------------------------------|------|------|-------|------|
|                  | 1                                             | 2    | 3    | Mean  | SD   |
| Cell control     | 29.9                                          | 30   | 28.9 | 29.60 | 0.61 |
| Vehicle control  | 34                                            | 31.8 | 35   | 33.60 | 1.64 |
| Positive control | 11.99                                         | 17.2 | 16.5 | 15.23 | 2.83 |
| ZOEO 2 µg/mL     | 28.7                                          | 28   | 29.1 | 28.60 | 0.56 |
| ZOEO 3 µg/mL     | 25.1                                          | 27.4 | 26.4 | 26.30 | 1.15 |
| ZOEO 10 µg/mL    | 32                                            | 28.4 | 27.9 | 29.43 | 2.24 |

| Treatments       | S population (%) |      |      |       |      |
|------------------|------------------|------|------|-------|------|
|                  | 1                | 2    | 3    | Mean  | SD   |
| Cell control     | 39.7             | 37.1 | 35.9 | 37.57 | 1.94 |
| Vehicle control  | 32.3             | 37.3 | 33.9 | 34.50 | 2.55 |
| Positive control | 13.97            | 11.7 | 8.12 | 11.26 | 2.95 |
| ZOEO 2 µg/mL     | 32.3             | 35   | 32.6 | 33.30 | 1.48 |
| ZOEO 3 µg/mL     | 34.6             | 32.6 | 32.7 | 33.30 | 1.13 |
| ZOEO 10 µg/mL    | 26.5             | 33.7 | 28.5 | 29.57 | 3.72 |

| <b>Treatments</b> | <b>G<sub>2</sub>/M population (%)</b> |      |       |       |      |
|-------------------|---------------------------------------|------|-------|-------|------|
|                   | 1                                     | 2    | 3     | Mean  | SD   |
| Cell control      | 23.8                                  | 25.9 | 26.47 | 25.39 | 1.41 |
| Vehicle control   | 27.4                                  | 23.2 | 25.7  | 25.43 | 2.11 |
| Positive control  | 7.40                                  | 11.2 | 12.08 | 10.23 | 2.49 |
| ZOEO 2 µg/mL      | 27.5                                  | 26.1 | 27    | 26.87 | 0.71 |
| ZOEO 3 µg/mL      | 27.4                                  | 26.8 | 27.5  | 27.23 | 0.38 |
| ZOEO 10 µg/mL     | 28.2                                  | 21.6 | 26.2  | 25.33 | 3.38 |
