# Supplementary material for: Anticancer activity of Zingiber ottensii essential oil and its nanoformulations
Source: PubMed Central journal article supplement (PMC8786151; doi:10.1371/journal.pone.0262335), 2022-01-24
Supplement: pone.0262335.s008.pdf [file pone.0262335.s008.pdf]

**S7 Table. Apoptosis assay by flow cytometry after staining with double annexin V-FITC/propidium iodide (PI).**

| <b>Treatments</b>        | <b>Apoptotic cells (%)</b> |      |      |       |      |
|--------------------------|----------------------------|------|------|-------|------|
|                          | 1                          | 2    | 3    | Mean  | SD   |
| Cell control             | 8.3                        | 10.2 | 10.9 | 9.80  | 1.35 |
| Vehicle control          | 10.4                       | 11.3 | 9.2  | 10.30 | 1.05 |
| Positive control         | 52.3                       | 53.4 | 55.5 | 53.73 | 1.63 |
| ZOEO 2 $\mu\text{g/mL}$  | 5.9                        | 8.6  | 14   | 9.50  | 4.12 |
| ZOEO 3 $\mu\text{g/mL}$  | 6.1                        | 9    | 15.1 | 10.07 | 4.59 |
| ZOEO 10 $\mu\text{g/mL}$ | 32                         | 19.3 | 28.2 | 26.50 | 6.52 |

**S8. Cytotoxicity of ZOEO loaded nanoformulations against A549 cells (Table 5).**

| Nanoformulations | IC <sub>50</sub> value (ng of essential oil/mL) |       |       |       |       |
|------------------|-------------------------------------------------|-------|-------|-------|-------|
|                  | 1                                               | 2     | 3     | Mean  | SD    |
| NE-ZO-S          | 19.87                                           | 20.82 | 14.64 | 18.45 | 3.33  |
| NE-ZO-B          | >50                                             | >50   | >50   | >50   | -     |
| ME-ZO-S          | 25.21                                           | 17.53 | 41.97 | 28.24 | 12.50 |
| ME-ZO-B          | >50                                             | >50   | >50   | >50   | -     |
| NG-ZO-S          | 35.03                                           | 29.49 | 45.74 | 36.76 | 8.26  |
| NG-ZO-B          | >50                                             | >50   | >50   | >50   | -     |
| MG-ZO-S          | 32.52                                           | 30.16 | 38.53 | 33.74 | 4.31  |
| MG-ZO-B          | >50                                             | >50   | >50   | >50   | -     |

**S9. Cytotoxicity of ZOEO loaded nanoformulations against MCF-7 cells (Table 5).**

| Nanoformulations | IC <sub>50</sub> value (ng of essential oil/mL) |       |      |      |      |
|------------------|-------------------------------------------------|-------|------|------|------|
|                  | 1                                               | 2     | 3    | Mean | SD   |
| NE-ZO-S          | 5.97                                            | 1.00  | 2.28 | 3.08 | 2.58 |
| NE-ZO-B          | >50                                             | >50   | >50  | >50  | -    |
| ME-ZO-S          | 1.22                                            | 0.65  | 0.34 | 0.74 | 0.45 |
| ME-ZO-B          | >50                                             | >50   | >50  | >50  | -    |
| NG-ZO-S          | 2.25                                            | 3.24  | 1.41 | 2.30 | 0.91 |
| NG-ZO-B          | >50                                             | >50   | >50  | >50  | -    |
| MG-ZO-S          | 3.77                                            | 13.14 | 2.44 | 6.45 | 5.84 |
| MG-ZO-B          | >50                                             | >50   | >50  | >50  | -    |

**S10. Cytotoxicity of ZOEO loaded nanoformulations against HeLa cells (Table 5).**

| Nanoformulations | IC <sub>50</sub> value (ng of essential oil/mL) |       |       |       |      |
|------------------|-------------------------------------------------|-------|-------|-------|------|
|                  | 1                                               | 2     | 3     | Mean  | SD   |
| NE-ZO-S          | 4.16                                            | 8.54  | 4.74  | 5.81  | 2.38 |
| NE-ZO-B          | >50                                             | >50   | >50   | >50   | -    |
| ME-ZO-S          | 4.67                                            | 9.65  | 7.41  | 7.24  | 2.49 |
| ME-ZO-B          | >50                                             | >50   | >50   | >50   | -    |
| NG-ZO-S          | 8.49                                            | 7.14  | 11.01 | 8.88  | 1.97 |
| NG-ZO-B          | >50                                             | >50   | >50   | >50   | -    |
| MG-ZO-S          | 8.75                                            | 10.52 | 13.75 | 11.01 | 2.54 |
| MG-ZO-B          | >50                                             | >50   | >50   | >50   | -    |

**S11. Cytotoxicity of ZOEO loaded nanoformulations against K562 cells (Table 5).**

| Nanoformulations | IC <sub>50</sub> value (ng of essential oil/mL) |       |       |       |      |
|------------------|-------------------------------------------------|-------|-------|-------|------|
|                  | 1                                               | 2     | 3     | Mean  | SD   |
| NE-ZO-S          | 31.18                                           | 33.57 | 32.70 | 32.48 | 1.21 |
| NE-ZO-B          | >50                                             | >50   | >50   | >50   | -    |
| ME-ZO-S          | 30.61                                           | 34.26 | 35.06 | 33.31 | 2.37 |
| ME-ZO-B          | >50                                             | >50   | >50   | >50   | -    |
| NG-ZO-S          | 34.18                                           | 37.33 | 34.54 | 35.35 | 1.72 |
| NG-ZO-B          | >50                                             | >50   | >50   | >50   | -    |
| MG-ZO-S          | 30.36                                           | 34.69 | 34.63 | 33.23 | 2.48 |
| MG-ZO-B          | >50                                             | >50   | >50   | >50   | -    |

Abundance

TIC: 62022207.D

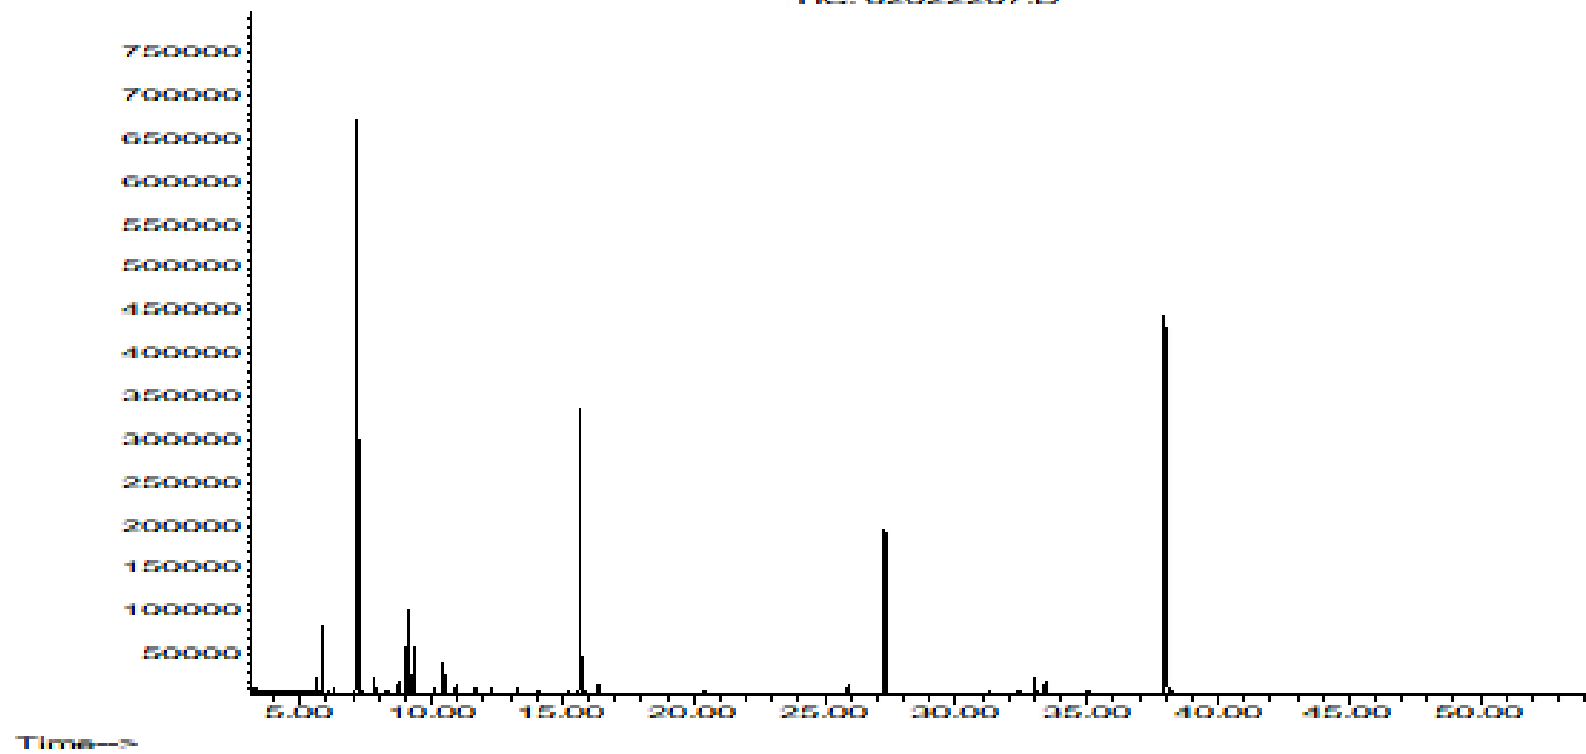

S12. GC chromatogram of ZOEO.
