# Supplementary material for: Anticancer activity of Zingiber ottensii essential oil and its nanoformulations
Source: PubMed Central journal article supplement (PMC8786151; doi:10.1371/journal.pone.0262335), 2022-01-24
Supplement: pone.0262335.s009.pdf [file pone.0262335.s009.pdf]

**S8 Table. Cytotoxicity of ZOEO loaded nanoformulations against A549 cells.**

| Nanoformulations | IC <sub>50</sub> value (ng of essential oil/mL) |       |       |       |       |
|------------------|-------------------------------------------------|-------|-------|-------|-------|
|                  | 1                                               | 2     | 3     | Mean  | SD    |
| NE-ZO-S          | 19.87                                           | 20.82 | 14.64 | 18.45 | 3.33  |
| NE-ZO-B          | >50                                             | >50   | >50   | >50   | -     |
| ME-ZO-S          | 25.21                                           | 17.53 | 41.97 | 28.24 | 12.50 |
| ME-ZO-B          | >50                                             | >50   | >50   | >50   | -     |
| NG-ZO-S          | 35.03                                           | 29.49 | 45.74 | 36.76 | 8.26  |
| NG-ZO-B          | >50                                             | >50   | >50   | >50   | -     |
| MG-ZO-S          | 32.52                                           | 30.16 | 38.53 | 33.74 | 4.31  |
| MG-ZO-B          | >50                                             | >50   | >50   | >50   | -     |
