# Supplementary material for: Anticancer activity of Zingiber ottensii essential oil and its nanoformulations
Source: PubMed Central journal article supplement (PMC8786151; doi:10.1371/journal.pone.0262335), 2022-01-24
Supplement: pone.0262335.s010.pdf [file pone.0262335.s010.pdf]

**S9 Table. Cytotoxicity of ZOEO loaded nanoformulations against MCF-7 cells.**

| Nanoformulations | IC <sub>50</sub> value (ng of essential oil/mL) |       |      |      |      |
|------------------|-------------------------------------------------|-------|------|------|------|
|                  | 1                                               | 2     | 3    | Mean | SD   |
| NE-ZO-S          | 5.97                                            | 1.00  | 2.28 | 3.08 | 2.58 |
| NE-ZO-B          | >50                                             | >50   | >50  | >50  | -    |
| ME-ZO-S          | 1.22                                            | 0.65  | 0.34 | 0.74 | 0.45 |
| ME-ZO-B          | >50                                             | >50   | >50  | >50  | -    |
| NG-ZO-S          | 2.25                                            | 3.24  | 1.41 | 2.30 | 0.91 |
| NG-ZO-B          | >50                                             | >50   | >50  | >50  | -    |
| MG-ZO-S          | 3.77                                            | 13.14 | 2.44 | 6.45 | 5.84 |
| MG-ZO-B          | >50                                             | >50   | >50  | >50  | -    |
