# Supplementary material for: Anticancer activity of Zingiber ottensii essential oil and its nanoformulations
Source: PubMed Central journal article supplement (PMC8786151; doi:10.1371/journal.pone.0262335), 2022-01-24
Supplement: pone.0262335.s011.pdf [file pone.0262335.s011.pdf]

**S10 Table. Cytotoxicity of ZOEO loaded nanoformulations against HeLa cells.**

| Nanoformulations | IC <sub>50</sub> value (ng of essential oil/mL) |       |       |       |      |
|------------------|-------------------------------------------------|-------|-------|-------|------|
|                  | 1                                               | 2     | 3     | Mean  | SD   |
| NE-ZO-S          | 4.16                                            | 8.54  | 4.74  | 5.81  | 2.38 |
| NE-ZO-B          | >50                                             | >50   | >50   | >50   | -    |
| ME-ZO-S          | 4.67                                            | 9.65  | 7.41  | 7.24  | 2.49 |
| ME-ZO-B          | >50                                             | >50   | >50   | >50   | -    |
| NG-ZO-S          | 8.49                                            | 7.14  | 11.01 | 8.88  | 1.97 |
| NG-ZO-B          | >50                                             | >50   | >50   | >50   | -    |
| MG-ZO-S          | 8.75                                            | 10.52 | 13.75 | 11.01 | 2.54 |
| MG-ZO-B          | >50                                             | >50   | >50   | >50   | -    |
