# Supplementary material for: Anticancer activity of Zingiber ottensii essential oil and its nanoformulations
Source: PubMed Central journal article supplement (PMC8786151; doi:10.1371/journal.pone.0262335), 2022-01-24
Supplement: pone.0262335.s012.pdf [file pone.0262335.s012.pdf]

**S11 Table. Cytotoxicity of ZOEO loaded nanoformulations against K562 cells.**

| Nanoformulations | IC <sub>50</sub> value (ng of essential oil/mL) |       |       |       |      |
|------------------|-------------------------------------------------|-------|-------|-------|------|
|                  | 1                                               | 2     | 3     | Mean  | SD   |
| NE-ZO-S          | 31.18                                           | 33.57 | 32.70 | 32.48 | 1.21 |
| NE-ZO-B          | >50                                             | >50   | >50   | >50   | -    |
| ME-ZO-S          | 30.61                                           | 34.26 | 35.06 | 33.31 | 2.37 |
| ME-ZO-B          | >50                                             | >50   | >50   | >50   | -    |
| NG-ZO-S          | 34.18                                           | 37.33 | 34.54 | 35.35 | 1.72 |
| NG-ZO-B          | >50                                             | >50   | >50   | >50   | -    |
| MG-ZO-S          | 30.36                                           | 34.69 | 34.63 | 33.23 | 2.48 |
| MG-ZO-B          | >50                                             | >50   | >50   | >50   | -    |
